# Supplementary material for: Ferro-vs.antiferromagnetic exchange between two Ni(ii) ions in a series of Schiff base heterometallic complexes: what makes the difference?
Source: Royal Society of Chemistry journal article supplement (doi:10.1039/d0dt03957h), 2021-01-01
Supplement: d0dt03957h1.pdf [file d0dt03957h1.pdf]

**Ferro- vs. antiferromagnetic exchange between two Ni(II) ions in a series of Schiff base heterometallic complexes: what makes the difference?**

Olga Yu. Vassilyeva, Elena A. Buvaylo, Vladimir N. Kokozay, Brian W. Skelton, Alexandre N. Sobolev, Alina Bieńko and Andrew Ozarowski

**Supplementary data**

**Table S1.** Selected bond lengths [Å] and angles [°] for [NiZnL'<sub>2</sub>(OMe)Cl]<sub>2</sub> (**1**) and [NiZnL''(Dea)Cl]<sub>2</sub>·2DMF (**2**)

| <b>1</b>                                     |             | <b>2</b>                       |            |
|----------------------------------------------|-------------|--------------------------------|------------|
| Zn(1)–O(21)                                  | 2.000 (2)   | Zn(1)–O(7) <sup>2</sup>        | 1.9599(11) |
| Zn(1)–O(11)                                  | 2.0053 (19) | Zn(1)–O(11)                    | 1.9901(11) |
| Zn(1)–O(1)                                   | 2.0980 (18) | Zn(1)–O(1)                     | 2.0883(10) |
| Zn(1)–Cl(1)                                  | 2.2763 (8)  | Zn(1)–Cl(1)                    | 2.2106(5)  |
| Zn(1)–O(12)                                  | 2.477 (2)   | Zn(1)–O(17)                    | 2.3674(11) |
| Ni(1)–O(11)                                  | 2.019 (2)   | Ni(1)–O(11)                    | 2.0212(10) |
| Ni(1)–O(21) <sup>1</sup>                     | 2.030 (2)   | Ni(1)–N(10)                    | 2.0364(13) |
| Ni(1)–N(26) <sup>1</sup>                     | 2.072 (3)   | Ni(1)–O(1)                     | 2.0736(10) |
| Ni(1)–N(16)                                  | 2.077 (3)   | Ni(1)–O(1) <sup>2</sup>        | 2.0850(10) |
| Ni(1)–O(1) <sup>1</sup>                      | 2.091 (2)   | Ni(1)–O(7)                     | 2.0940(11) |
| Ni(1)–O(1)                                   | 2.097 (2)   | Ni(1)–N(4)                     | 2.1126(13) |
|                                              |             |                                |            |
| O(21)–Zn(1)–O(11)                            | 99.04 (9)   | O(7) <sup>2</sup> –Zn(1)–O(11) | 111.47(5)  |
| O(21)–Zn(1)–O(1)                             | 81.32 (8)   | O(7) <sup>2</sup> –Zn(1)–O(1)  | 85.63(4)   |
| O(11)–Zn(1)–O(1)                             | 80.23 (8)   | O(11)–Zn(1)–O(1)               | 80.70(4)   |
| O(21)–Zn(1)–Cl(1)                            | 133.36 (6)  | O(7) <sup>2</sup> –Zn(1)–Cl(1) | 120.55(4)  |
| O(11)–Zn(1)–Cl(1)                            | 127.59 (7)  | O(11)–Zn(1)–Cl(1)              | 127.30(4)  |
| O(1)–Zn(1)–Cl(1)                             | 103.33 (6)  | O(1)–Zn(1)–Cl(1)               | 109.90(3)  |
| O(21)–Zn(1)–O(12)                            | 110.21 (8)  | O(7) <sup>2</sup> –Zn(1)–O(17) | 95.93(4)   |
| O(11)–Zn(1)–O(12)                            | 69.17 (7)   | O(11)–Zn(1)–O(17)              | 71.78(4)   |
| O(1)–Zn(1)–O(12)                             | 148.45 (8)  | O(1)–Zn(1)–O(17)               | 151.02(4)  |
| Cl(1)–Zn(1)–O(12)                            | 89.93 (5)   | Cl(1)–Zn(1)–O(17)              | 94.24(4)   |
| O(11)–Ni(1)–O(21) <sup>1</sup>               | 174.91 (9)  | O(11)–Ni(1)–N(10)              | 86.55(5)   |
| O(11)–Ni(1)–N(26) <sup>1</sup>               | 94.94 (10)  | O(11)–Ni(1)–O(1)               | 80.34(4)   |
| O(21) <sup>1</sup> –Ni(1)–N(26) <sup>1</sup> | 89.26 (10)  | N(10)–Ni(1)–O(1)               | 166.39(5)  |
| O(11)–Ni(1)–N(16)                            | 89.42 (9)   | O(11)–Ni(1)–O(1) <sup>2</sup>  | 95.44(4)   |
| O(21) <sup>1</sup> –Ni(1)–N(16)              | 93.08 (9)   | N(10)–Ni(1)–O(1) <sup>2</sup>  | 96.06(5)   |
| N(26) <sup>1</sup> –Ni(1)–N(16)              | 94.90 (11)  | O(1)–Ni(1)–O(1) <sup>2</sup>   | 81.67(4)   |
| O(11)–Ni(1)–O(1) <sup>1</sup>                | 94.59 (8)   | O(11)–Ni(1)–O(7)               | 172.53(4)  |
| O(21) <sup>1</sup> –Ni(1)–O(1) <sup>1</sup>  | 80.80 (8)   | N(10)–Ni(1)–O(7)               | 86.56(5)   |
| N(26) <sup>1</sup> –Ni(1)–O(1) <sup>1</sup>  | 166.71 (10) | O(1)–Ni(1)–O(7)                | 106.32(4)  |
| N(16)–Ni(1)–O(1) <sup>1</sup>                | 94.43 (10)  | O(1) <sup>2</sup> –Ni(1)–O(7)  | 82.41(4)   |
| O(11)–Ni(1)–O(1)                             | 79.96 (7)   | O(11)–Ni(1)–N(4)               | 102.46(5)  |
| O(21) <sup>1</sup> –Ni(1)–O(1)               | 96.98 (8)   | N(10)–Ni(1)–N(4)               | 103.94(5)  |
| N(26) <sup>1</sup> –Ni(1)–O(1)               | 93.11 (9)   | O(1)–Ni(1)–N(4)                | 82.61(4)   |
| N(16)–Ni(1)–O(1)                             | 167.21 (10) | O(1) <sup>2</sup> –Ni(1)–N(4)  | 153.77(4)  |
| O(1) <sup>1</sup> –Ni(1)–O(1)                | 79.47 (8)   | O(7)–Ni(1)–N(4)                | 82.04(5)   |

Symmetry transformations used to generate equivalent atoms: <sup>1</sup> -x+1/2, -y+3/2, -z+1; <sup>2</sup> -x, 1-y, 1-z

**Table S2.** Selected bond lengths [Å] and angles [°] for [Ni<sub>2</sub>(H<sub>3</sub>L''')<sub>2</sub>(*o*-Van)(MeOH)<sub>2</sub>]Cl·[ZnCl<sub>2</sub>(H<sub>4</sub>L''')<sub>2</sub>(MeOH)]·2MeOH (**3**)

|                     |            |                    |            |
|---------------------|------------|--------------------|------------|
| Ni(1)–O(11)         | 1.989(3)   | Ni(2)–O(51)        | 2.065(3)   |
| Ni(1)–N(10)         | 1.997(4)   | Ni(2)–O(211)       | 2.085(3)   |
| Ni(1)–O(31)         | 2.033(3)   | Ni(2)–O(36)        | 2.153(3)   |
| Ni(1)–O(321)        | 2.078(3)   |                    |            |
| Ni(1)–O(41)         | 2.083(3)   | Zn(3)–O(61)        | 1.966(3)   |
| Ni(1)–O(111)        | 2.096(3)   | Zn(3)–O(71)        | 2.078(4)   |
| Ni(2)–O(21)         | 1.995(3)   | Zn(3)–Cl(2)        | 2.2465(13) |
| Ni(2)–N(20)         | 2.000(4)   | Zn(3)–Cl(1)        | 2.2558(13) |
| Ni(2)–O(31)         | 2.043(3)   | Zn(3)–O(66)        | 2.425(3)   |
|                     |            |                    |            |
| O(11)–Ni(1)–N(10)   | 95.19(14)  | O(31)–Ni(2)–O(51)  | 92.70(12)  |
| O(11)–Ni(1)–O(31)   | 92.56(12)  | O(21)–Ni(2)–O(211) | 174.41(12) |
| N(10)–Ni(1)–O(31)   | 171.32(14) | N(20)–Ni(2)–O(211) | 81.24(13)  |
| O(11)–Ni(1)–O(321)  | 91.43(12)  | O(31)–Ni(2)–O(211) | 88.94(12)  |
| N(10)–Ni(1)–O(321)  | 87.70(13)  | O(51)–Ni(2)–O(211) | 88.28(12)  |
| O(31)–Ni(1)–O(321)  | 88.20(12)  | O(21)–Ni(2)–O(36)  | 90.26(12)  |
| O(11)–Ni(1)–O(41)   | 92.61(12)  | N(20)–Ni(2)–O(36)  | 97.64(13)  |
| N(10)–Ni(1)–O(41)   | 93.21(13)  | O(31)–Ni(2)–O(36)  | 76.28(11)  |
| O(31)–Ni(1)–O(41)   | 90.34(12)  | O(51)–Ni(2)–O(36)  | 168.62(12) |
| O(321)–Ni(1)–O(41)  | 175.77(13) | O(211)–Ni(2)–O(36) | 88.65(12)  |
| O(11)–Ni(1)–O(111)  | 176.34(12) | O(61)–Zn(3)–O(71)  | 86.52(13)  |
| N(10)–Ni(1)–O(111)  | 81.51(14)  | O(61)–Zn(3)–Cl(2)  | 118.11(11) |
| O(31)–Ni(1)–O(111)  | 90.84(12)  | O(71)–Zn(3)–Cl(2)  | 101.10(15) |
| O(321)–Ni(1)–O(111) | 90.03(12)  | O(61)–Zn(3)–Cl(1)  | 125.60(11) |
| O(41)–Ni(1)–O(111)  | 86.02(12)  | O(71)–Zn(3)–Cl(1)  | 98.97(14)  |
| O(21)–Ni(2)–N(20)   | 93.48(13)  | Cl(2)–Zn(3)–Cl(1)  | 113.75(5)  |
| O(21)–Ni(2)–O(31)   | 96.13(12)  | O(61)–Zn(3)–O(66)  | 72.28(12)  |
| N(20)–Ni(2)–O(31)   | 168.62(13) | O(71)–Zn(3)–O(66)  | 157.53(13) |
| O(21)–Ni(2)–O(51)   | 93.82(12)  | Cl(2)–Zn(3)–O(66)  | 95.55(9)   |
| N(20)–Ni(2)–O(51)   | 92.72(13)  | Cl(1)–Zn(3)–O(66)  | 87.86(9)   |

**Table S3.** Geometry of hydrogen bonds for **3** (Å and °)

| D–H...A                             | d(D–H)    | d(H...A) | d(D...A) | <(DHA) |
|-------------------------------------|-----------|----------|----------|--------|
| O(113)–H(113)...Cl(3)               | 0.84(2)   | 2.21(2)  | 3.047(4) | 176(6) |
| N(60)–H(60N)...O(61)                | 0.881(19) | 1.97(4)  | 2.620(5) | 130(4) |
| O(612)–H(612)...O(213)              | 0.83(2)   | 1.90(2)  | 2.717(5) | 170(7) |
| O(71)–H(71)...O(611)                | 0.84(2)   | 1.84(3)  | 2.666(5) | 166(8) |
| O(111)–H(111)...O(91)               | 0.84(2)   | 1.84(2)  | 2.666(4) | 168(6) |
| O(112)–H(112)...O(11) <sup>1</sup>  | 0.83(2)   | 1.95(3)  | 2.762(4) | 166(6) |
| O(211)–H(211)...O(112) <sup>2</sup> | 0.84(2)   | 1.77(2)  | 2.605(4) | 169(6) |
| O(212)–H(212)...Cl(3) <sup>3</sup>  | 0.84(2)   | 2.24(2)  | 3.069(4) | 168(6) |
| O(213)–H(213)...Cl(1) <sup>4</sup>  | 0.84(2)   | 2.35(2)  | 3.180(3) | 171(6) |
| O(41)–H(41)...O(21)                 | 0.83(2)   | 1.86(2)  | 2.676(4) | 167(3) |

|                                    |         |         |          |        |
|------------------------------------|---------|---------|----------|--------|
| O(51)-H(51)...O(11)                | 0.81(2) | 1.89(3) | 2.664(4) | 160(5) |
| O(611)-H(611)...O(81) <sup>4</sup> | 0.84(2) | 1.82(2) | 2.645(5) | 170(6) |
| O(613)-H(613)...Cl(3) <sup>5</sup> | 0.85(2) | 2.23(3) | 3.064(4) | 167(6) |
| O(81)-H(81)...Cl(2)                | 0.84(2) | 2.27(2) | 3.108(4) | 171(6) |
| O(91)-H(91)...O(21)                | 0.84(2) | 2.04(3) | 2.850(4) | 163(6) |
| O(112)-H(112)...O(16) <sup>1</sup> | 0.83(2) | 2.58(5) | 3.130(5) | 125(5) |
| O(51)-H(51)...O(16)                | 0.81(2) | 2.59(4) | 3.185(4) | 131(4) |

Symmetry transformations used to generate equivalent atoms: <sup>1</sup> -x,y+1/2,-z+3/2; <sup>2</sup> -x,y-1/2,-z+3/2;  
<sup>3</sup> x,y-1,z; <sup>4</sup> -x+1,y-1/2,-z+3/2; <sup>5</sup> -x+1,-y+1,-z+2.

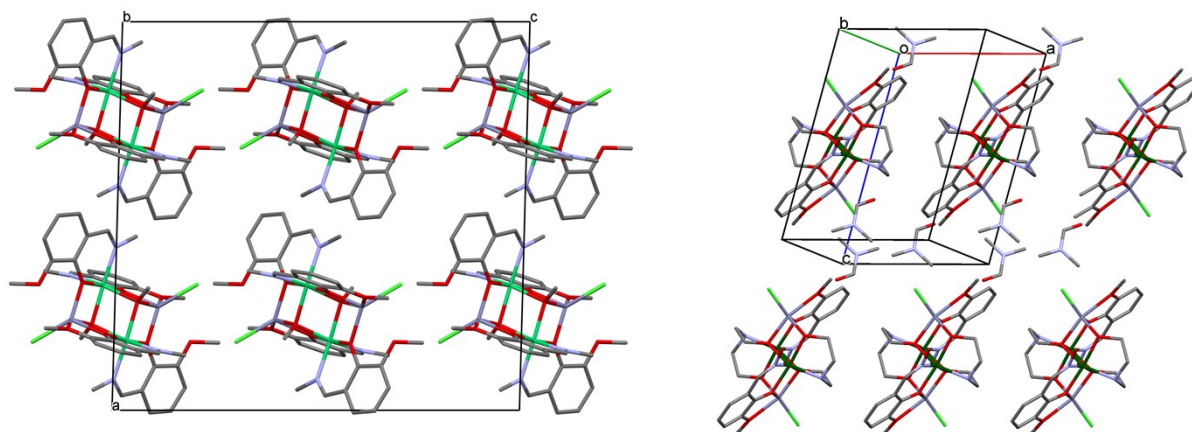

**Figure S1.** Fragments of crystal packing of  $[\text{NiZnL}'_2(\text{OMe})\text{Cl}]_2$  (**1**, left) and  $[\text{NiZnL}''(\text{Dea})\text{Cl}]_2 \cdot 2\text{DMF}$  (**2**, right). CH hydrogen atoms are omitted for clarity.

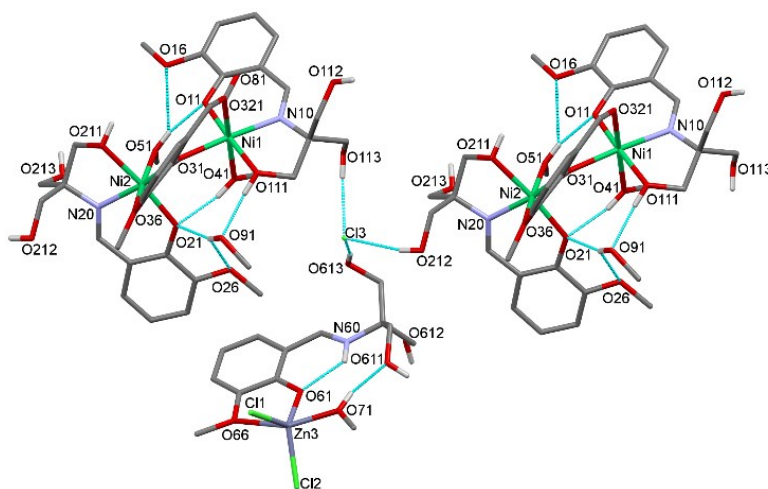

**Figure S2.** Fragment of the crystal structure of **3** showing the hydrogen bonding environment of the chloride anion Cl3. CH hydrogen atoms are omitted for clarity, H-bonds are shown as blue dotted lines.

**Table S4.** Results of magnetic data fitting

| Complex                               | <b>1</b> | <b>2</b> | <b>3</b> |
|---------------------------------------|----------|----------|----------|
| $g_{\text{average}}$                  | 2.11(5)  | 2.23(2)  | 2.28(2)  |
| $J$ (cm <sup>-1</sup> )               | 7.7(1)   | -6.5(1)  | -0.6(2)  |
| $D_{\text{Ni}}^*$ (cm <sup>-1</sup> ) | 2.27     | -4.491   | -11.398  |
| $E_{\text{Ni}}^*$ (cm <sup>-1</sup> ) | 0.243    | -0.684   | -1.151   |
| $D_{12}^*$ (cm <sup>-1</sup> )        | -0.02    | 0.034    | 0**      |
| $E_{12}^*$ (cm <sup>-1</sup> )        | 0.04     | -0.06    | 0**      |
| Monomer fraction                      | 0.18     | 0**      | 0**      |
| $zJ$ (cm <sup>-1</sup> )              | 0.07     | 0.066    | -1.1(2)  |

\*Fixed as obtained from EPR. \*\*Fixed.

Note that energies in Tables S5-S7 do not include the spin-orbit coupling contribution.

**Table S5.** Contributions of the ligand-field states to the ZFS in **1**.

| Parent Term ( $O_h$ ) | Energy (cm <sup>-1</sup> ) | D (cm <sup>-1</sup> ) | E (cm <sup>-1</sup> ) |
|-----------------------|----------------------------|-----------------------|-----------------------|
| $^3T_{2g}(^3F)$       | $^3B_2$ 7842               | 13.385                | -10.062               |
|                       | $^3B_3$ 7905               | 11.544                | 17.661                |
|                       | $^3B_1$ 8009               | -23.483               | -7.359                |
| $^3T_{1g}(^3F)$       | 13366                      | 0.005                 | 0.004                 |
|                       | 13583                      | 0.003                 | -0.003                |
|                       | 13860                      | 0.002                 | -0.001                |
| $^1E_g(^1D)$          | 18523                      | -0.000                | 0.000                 |
|                       | 18576                      | -0.000                | 0.000                 |
| $^1T_{2g}(^1D)$       | 25586                      | -7.282                | -7.304                |
|                       | 25634                      | -7.270                | 7.292                 |
|                       | 25737                      | 14.384                | -0.005                |
| $^3T_{1g}(^3P)$       | 29067                      | 0.000                 | -0.000                |
|                       | 29175                      | 0.000                 | -0.000                |
|                       | 29349                      | 0.000                 | 0.000                 |
| $^1A_{1g}(^1G)$       | 29626                      | 0.005                 | 0.000                 |
| $^1T_{1g}(^1G)$       | 32389                      | -0.003                | 0.003                 |
|                       | 32468                      | -0.004                | -0.004                |
|                       | 32605                      | -0.004                | 0.004                 |
| $^1E_g(^1G)$          | 37646                      | -0.010                | 0.009                 |
|                       | 37706                      | -0.003                | 0.002                 |
| $^1T_{2g}(^1G)$       | 38273                      | 0.794                 | -0.141                |
|                       | 38422                      | -0.288                | 0.460                 |
|                       | 38472                      | -0.488                | -0.338                |
| $^1A_{1g}(^1S)$       | 71680                      | 0.000                 | 0.000                 |

**Table S6.** Contributions of the ligand-field states to the ZFS in **2**

| Parent Term ( $O_h$ ) | Energy ( $\text{cm}^{-1}$ ) | D ( $\text{cm}^{-1}$ ) | E ( $\text{cm}^{-1}$ ) |
|-----------------------|-----------------------------|------------------------|------------------------|
| ${}^3T_{2g}({}^3F)$   | ${}^3B_1$ 6802              | -47.001                | -4.604                 |
|                       | ${}^3B_2$ 7571              | 13.555                 | -4.040                 |
|                       | ${}^3B_3$ 7875              | 24.245                 | 7.631                  |
| ${}^3T_{1g}({}^3F)$   | 12295                       | 0.067                  | -0.062                 |
|                       | 12492                       | 0.032                  | -0.031                 |
|                       | 13730                       | 0.032                  | -0.007                 |
| ${}^1E_g({}^1D)$      | 18360                       | 0.008                  | -0.000                 |
|                       | 18444                       | -0.001                 | -0.001                 |
| ${}^1T_{2g}({}^1D)$   | 24490                       | 15.188                 | -0.018                 |
|                       | 25109                       | -7.152                 | 6.573                  |
|                       | 25476                       | -7.144                 | -6.545                 |
| ${}^3T_{1g}({}^3P)$   | 27830                       | 0.002                  | 0.000                  |
|                       | 28614                       | 0.003                  | -0.003                 |
|                       | 29131                       | -0.000                 | -0.000                 |
| ${}^1A_{1g}({}^1G)$   | 29445                       | -0.001                 | 0.004                  |
| ${}^1T_{1g}({}^1G)$   | 31406                       | -0.028                 | 0.029                  |
|                       | 32158                       | -0.026                 | -0.029                 |
|                       | 32367                       | -0.058                 | 0.051                  |
| ${}^1E_g({}^1G)$      | 36542                       | -0.004                 | 0.003                  |
|                       | 36967                       | -0.101                 | -0.057                 |
| ${}^1T_{2g}({}^1G)$   | 37319                       | -0.727                 | 0.180                  |
|                       | 37600                       | 0.356                  | -0.158                 |
|                       | 37746                       | 0.389                  | 0.043                  |
| ${}^1A_{1g}({}^1S)$   | 70918                       | 0.000                  | -0.000                 |

**Table S7.** Contributions of the ligand-field states to the ZFS in **3**

| Parent Term ( $O_h$ ) | Energy ( $\text{cm}^{-1}$ ) | D ( $\text{cm}^{-1}$ ) | E ( $\text{cm}^{-1}$ ) |
|-----------------------|-----------------------------|------------------------|------------------------|
| ${}^3T_{2g}({}^3F)$   | ${}^3B_1$ 6612              | -64.799                | -0.086                 |
|                       | ${}^3B_2$ 7806              | 26.750                 | -25.274                |
|                       | ${}^3B_3$ 8848              | 24.099                 | 22.153                 |
| ${}^3T_{1g}({}^3F)$   | 13028                       | 0.117                  | 0.059                  |
|                       | 13514                       | 0.219                  | -0.177                 |
|                       | 13902                       | -0.064                 | 0.003                  |
| ${}^1E_g({}^1D)$      | 18102                       | 0.006                  | -0.000                 |
|                       | 18582                       | 0.000                  | -0.000                 |
| ${}^1T_{2g}({}^1D)$   | 24446                       | 15.680                 | 0.003                  |
|                       | 25423                       | -7.119                 | 6.813                  |
|                       | 26483                       | -6.753                 | -6.442                 |
| ${}^3T_{1g}({}^3P)$   | 28322                       | 0.005                  | 0.004                  |
|                       | 29212                       | 0.011                  | -0.010                 |
|                       | 29859                       | -0.005                 | -0.002                 |
| ${}^1A_{1g}({}^1G)$   | 29976                       | 0.000                  | 0.001                  |
| ${}^1T_{1g}({}^1G)$   | 31319                       | -0.052                 | -0.043                 |
|                       | 32743                       | -0.092                 | 0.090                  |
|                       | 33440                       | 0.028                  | -0.000                 |
| ${}^1T_{2g}({}^1G)$   | 37320                       | 0.081                  | -0.005                 |
|                       | 37640                       | -0.028                 | 0.020                  |
|                       | 37966                       | -0.448                 | -0.012                 |
| ${}^1E_g({}^1G)$      | 38401                       | 0.776                  | 0.109                  |
|                       | 38563                       | -0.831                 | -0.210                 |
| ${}^1A_{1g}({}^1S)$   | 71630                       | 0.000                  | 0.000                  |

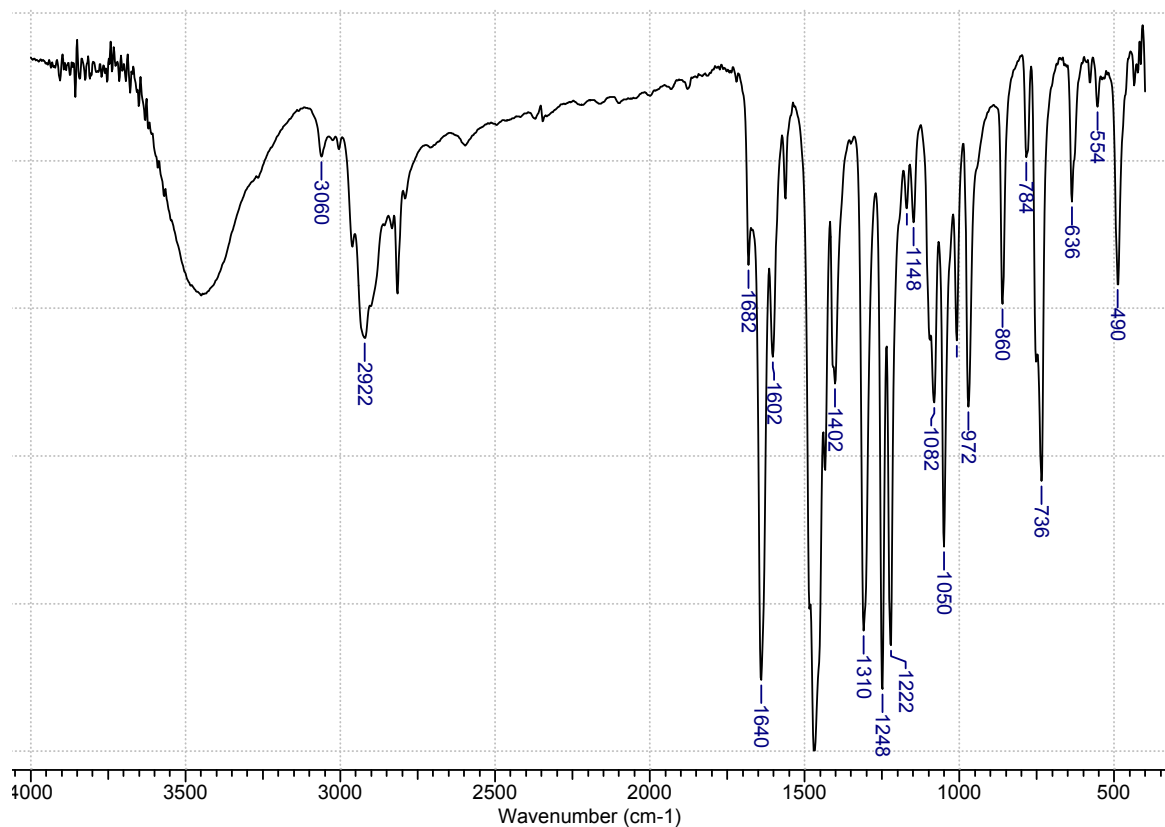

**Figure S3.** IR spectrum of  $[\text{NiZnL}'_2(\text{OMe})\text{Cl}]_2$  (1).

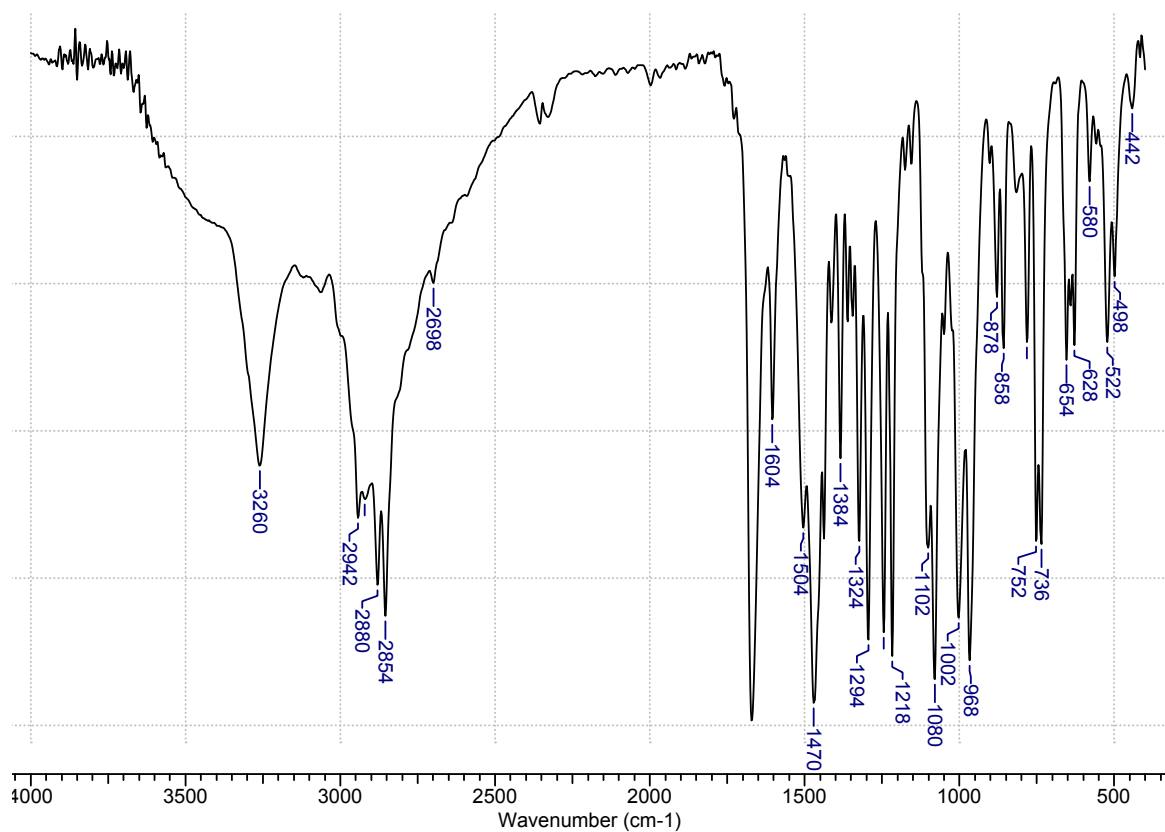

**Figure S4.** IR spectrum of  $[\text{NiZnL}''(\text{Dea})\text{Cl}]_2 \cdot 2\text{DMF}$  (2).

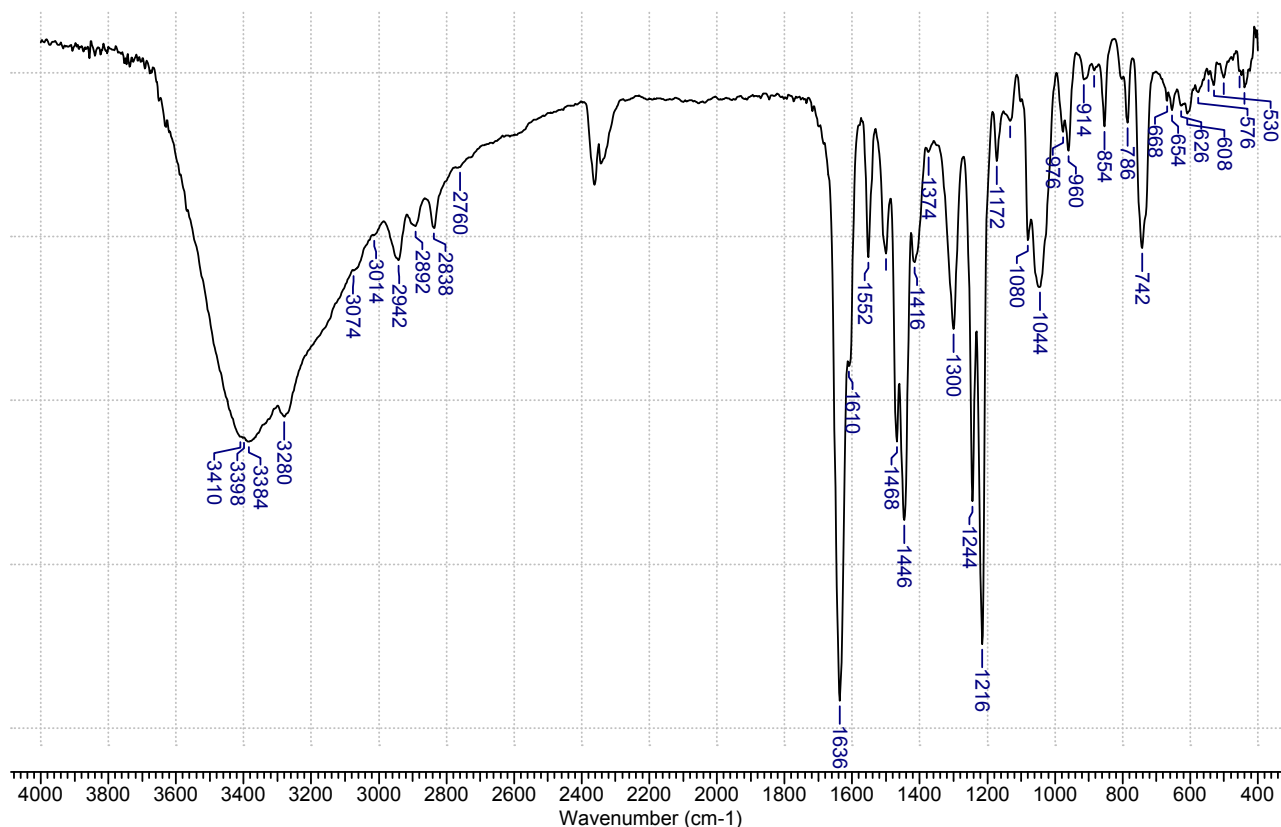

**Figure S5.** IR spectrum of  $[\text{Ni}_2(\text{H}_3\text{L}'')_2(o\text{-Van})(\text{MeOH})_2]\text{Cl}\cdot[\text{ZnCl}_2(\text{H}_4\text{L}'')](\text{MeOH})\cdot 2\text{MeOH}$  (**3**).

**Table S8.** Crystallographic data for **1–3**

|                                   | <b>1</b>                                                                             | <b>2</b>                                                                             | <b>3</b>                                                                           |
|-----------------------------------|--------------------------------------------------------------------------------------|--------------------------------------------------------------------------------------|------------------------------------------------------------------------------------|
| Empirical Formula                 | $\text{C}_{38}\text{H}_{46}\text{Cl}_2\text{N}_4\text{Ni}_2\text{O}_{10}\text{Zn}_2$ | $\text{C}_{30}\text{H}_{48}\text{Cl}_2\text{N}_6\text{Ni}_2\text{O}_{12}\text{Zn}_2$ | $\text{C}_{49}\text{H}_{76}\text{Cl}_3\text{N}_3\text{Ni}_2\text{O}_{23}\text{Zn}$ |
| Formula weight                    | 1037.85                                                                              | 1003.80                                                                              | 1364.26                                                                            |
| Crystal system                    | Monoclinic                                                                           | Triclinic                                                                            | Monoclinic                                                                         |
| Space group                       | $C2/c$                                                                               | $P\bar{1}$                                                                           | $P2_1/c$                                                                           |
| T/K                               | 100(2)                                                                               | 180(2)                                                                               | 100(2)                                                                             |
| $a/\text{\AA}$                    | 19.6732 (5)                                                                          | 8.9536(4)                                                                            | 17.7587(3)                                                                         |
| $b/\text{\AA}$                    | 10.9932 (2)                                                                          | 9.8327(4)                                                                            | 14.0514(2)                                                                         |
| $c/\text{\AA}$                    | 20.6092 (3)                                                                          | 13.4081(5)                                                                           | 24.0434(4)                                                                         |
| $\alpha/^\circ$                   | 90                                                                                   | 99.742(3)                                                                            | 90                                                                                 |
| $\beta/^\circ$                    | 91.555 (2)                                                                           | 104.655(4)                                                                           | 98.607(2)                                                                          |
| $\gamma/^\circ$                   | 90                                                                                   | 113.637(4)                                                                           | 90                                                                                 |
| $Z$                               | 4                                                                                    | 1                                                                                    | 4                                                                                  |
| $V/\text{\AA}^3$                  | 4455.54 (15)                                                                         | 996.23(7)                                                                            | 5932.09(17)                                                                        |
| $D_{\text{cal}}/\text{g cm}^{-3}$ | 1.547                                                                                | 1.673                                                                                | 1.528                                                                              |
| No. of reflections measured       | 20435                                                                                | 29860                                                                                | 57005                                                                              |
| No. of independent reflections    | 3977                                                                                 | 10146                                                                                | 10579                                                                              |

|                                                     |                               |                 |                  |
|-----------------------------------------------------|-------------------------------|-----------------|------------------|
| $R_{\text{int}}$                                    | 0.0385                        | 0.0357          | 0.0704           |
| Absorption correction                               | Semi-empirical<br>equivalents | from Analytical | Analytical       |
| Data / restraints / parameters                      | 3977/0/267                    | 10146 / 0 / 248 | 10579 / 16 / 795 |
| Goodness-of-fit on $F^2$                            | 1.002                         | 1.023           | 1.127            |
| Final $R_1$ values ( $I > 2\sigma(I)$ )             | 0.0403                        | 0.0376          | 0.0555           |
| Final $wR(F^2)$ values ( $I > 2\sigma(I)$ )         | 0.1127                        | 0.0845          | 0.1508           |
| Final $R_1$ values (all data)                       | 0.0463                        | 0.0592          | 0.0734           |
| Final $wR(F^2)$ values (all data)                   | 0.1179                        | 0.0955          | 0.1627           |
| Largest diff. peak and hole/ e<br>$\text{\AA}^{-3}$ | 1.34 / -0.36                  | 0.796 / -0.624  | 1.587 / -0.414   |
| CCDC No.                                            | 1898551                       | 1898552         | 1837991          |

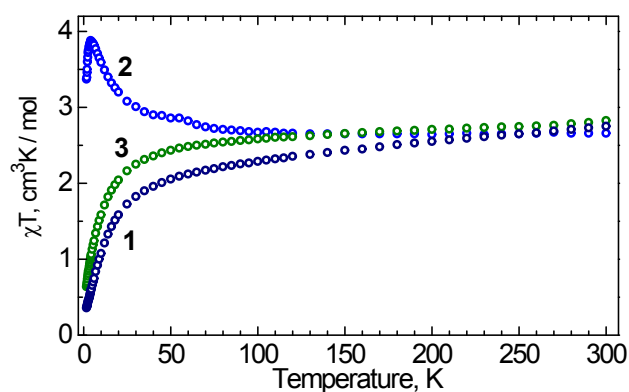

**Figure S6.** The original magnetic data. To obtain the plots in Figure 11 (main text), TIP per one  $\text{Ni}^{2+}$  of  $950 \cdot 10^{-6}$  cgs emu,  $250 \cdot 10^{-6}$  cgs emu and  $300 \cdot 10^{-6}$  cgs emu was subtracted from data of **1**, **2** and **3**, respectively.
